# Supplementary material for: Pentamethylcyclopentadienyl half-sandwich hydrazine complexes of ruthenium: preparation and reactivity
Source: Royal Society of Chemistry journal article supplement (doi:10.1039/c8nj06019c), 2019-01-01
Supplement: c8nj06019c1.pdf [file c8nj06019c1.pdf]

**Electronic Supporting Information**

Ms. title: Pentamethylcyclopentadienyl Half-Sandwich Hydrazine Complexes of Ruthenium: Preparation and Reactivity

Author: G. Albertin\* *et al.*

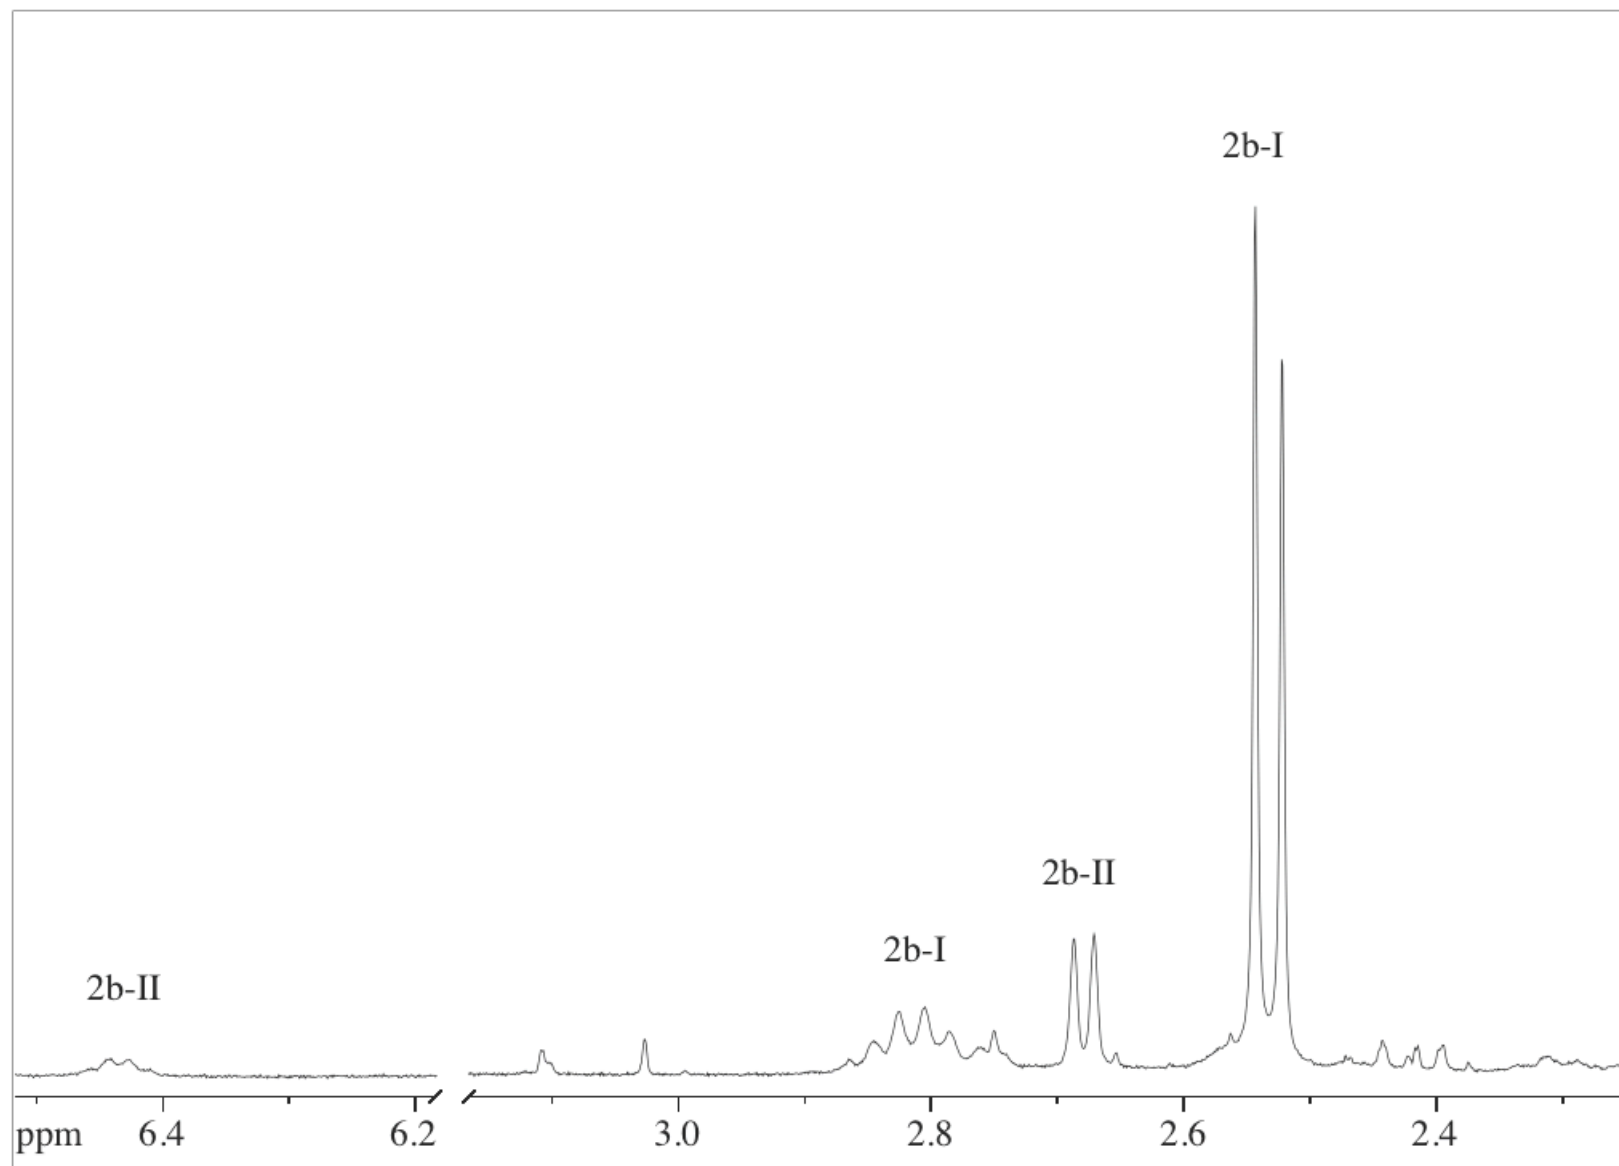

Fig. S1.  $^1\text{H}$  NMR spectrum in  $\text{CD}_2\text{Cl}_2$  of  $[\text{Ru}(\eta^5\text{-C}_5\text{Me}_5)(\text{NH}_2\text{NHCH}_3)\{\text{P}(\text{OEt})_3\}]\text{BPh}_4$  (**2b**).

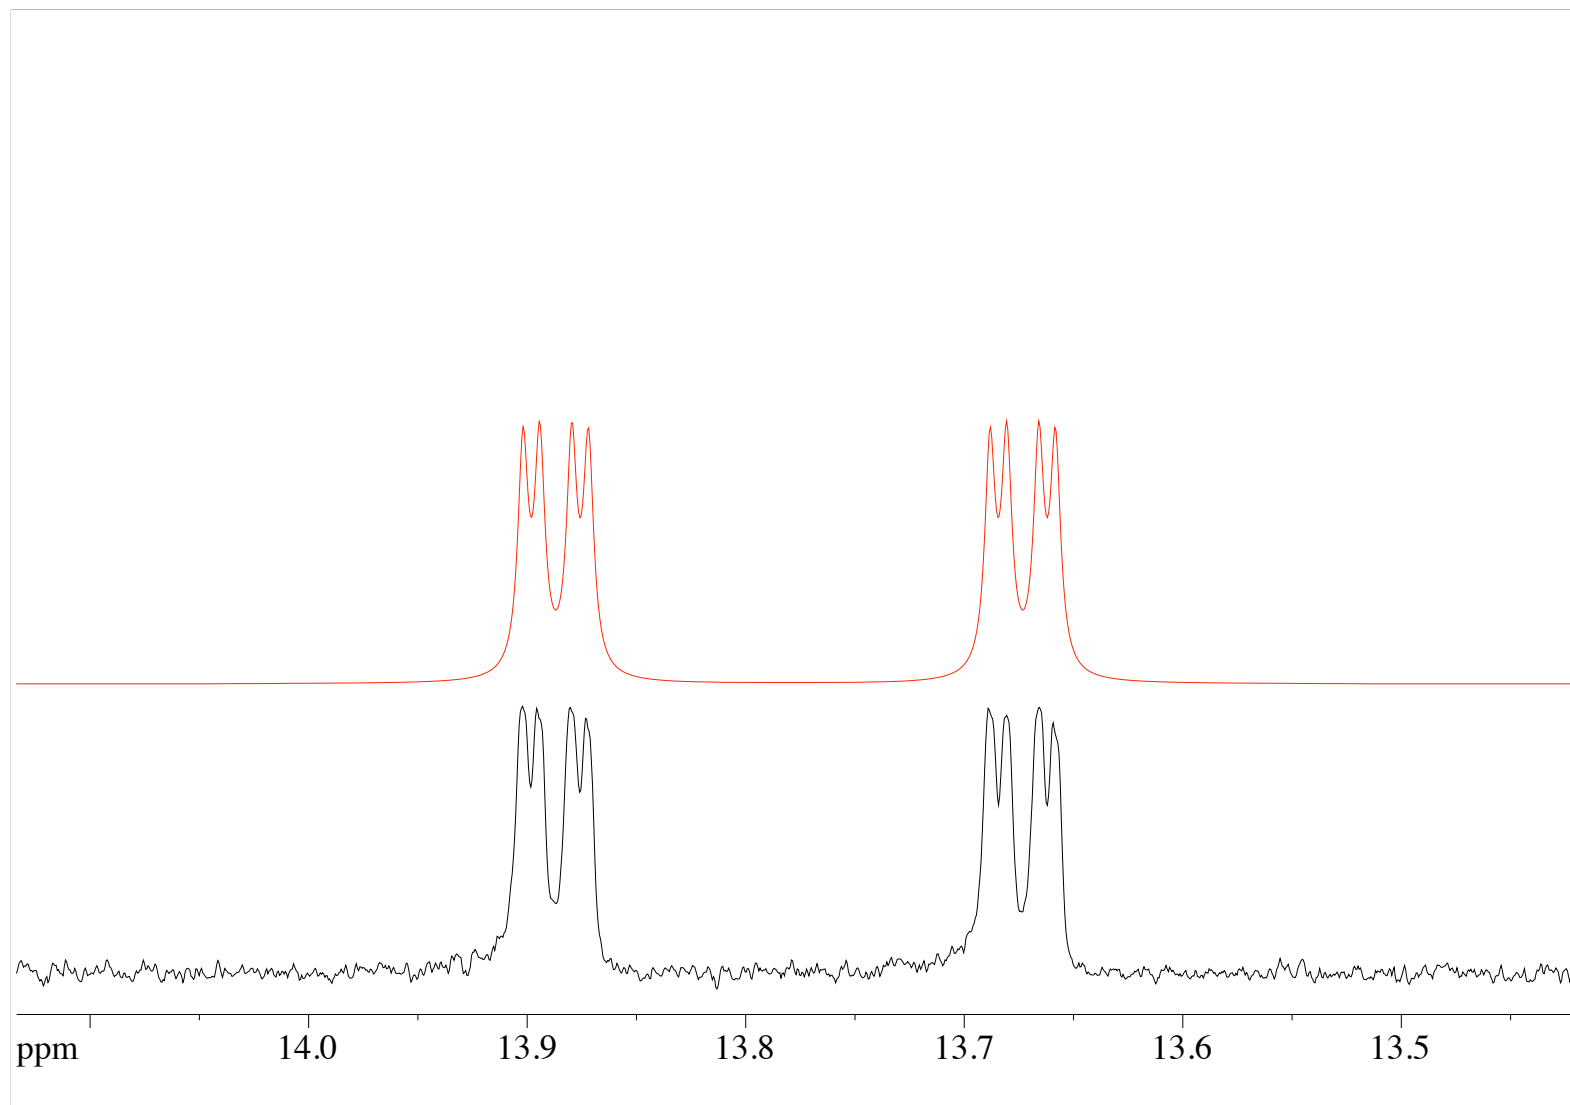

Fig. S2: <sup>1</sup>H NMR spectrum of complex  $[\text{Ru}(\eta^5\text{-C}_5\text{Me}_5)(^{15}\text{NH}=\text{NC}_6\text{H}_5)(\text{PPh}_3)\{\text{P}(\text{OEt})_3\}]\text{BPh}_4$  (**9c<sub>1</sub>**) in  $\text{CD}_2\text{Cl}_2$  at 298 K, in the diazene proton region. Lower, experimental spectrum; upper, simulated with the parameters reported in the Experimental section.

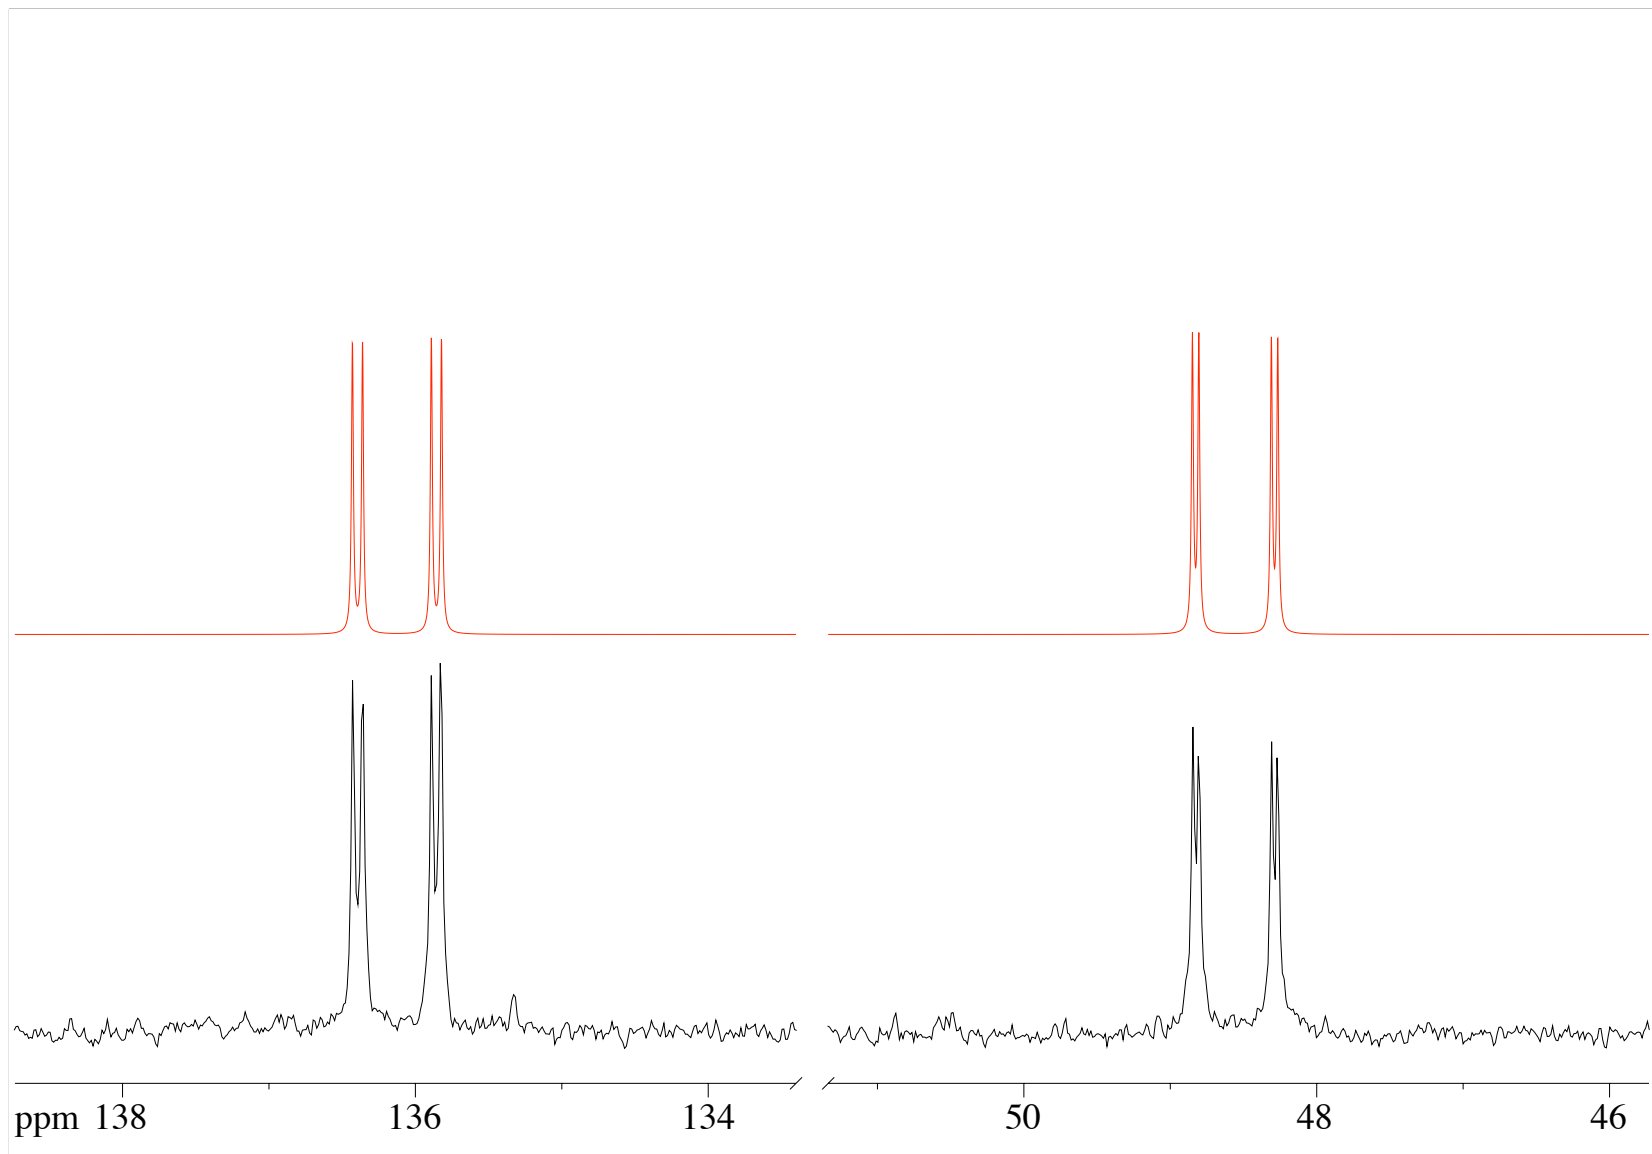

Fig. S3:  $^{31}\text{P}\{^1\text{H}\}$  NMR spectrum of complex  $[\text{Ru}(\eta^5\text{-C}_5\text{Me}_5)(^{15}\text{NH}=\text{NC}_6\text{H}_5)(\text{PPh}_3)\{\text{P}(\text{OEt})_3\}]\text{BPh}_4$  (**9c1**) in  $\text{CD}_2\text{Cl}_2$  at 298 K. Lower, experimental spectrum; upper, simulated with the parameters reported in the Experimental section.

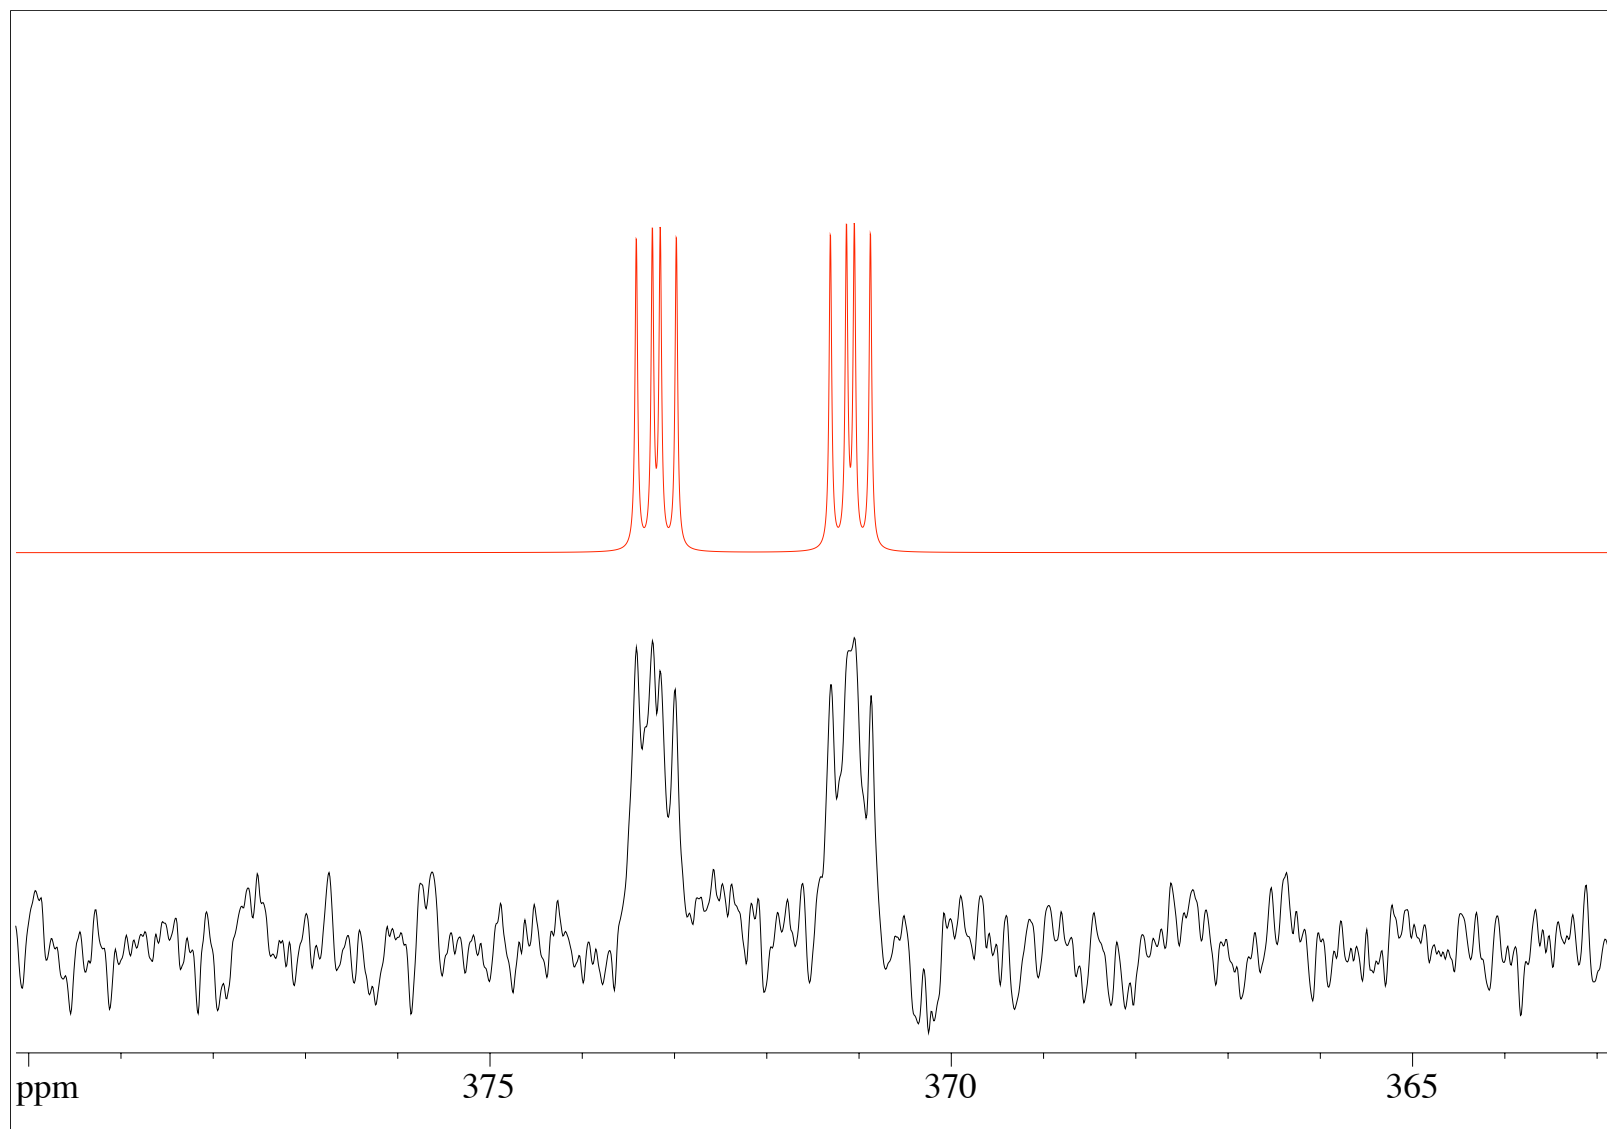

Fig. S4:  $^{15}\text{N}$  NMR spectrum of complex  $[\text{Ru}(\eta^5\text{-C}_5\text{Me}_5)(^{15}\text{NH}=\text{NC}_6\text{H}_5)(\text{PPh}_3)\{\text{P}(\text{OEt})_3\}]\text{BPh}_4$  (**9c<sub>1</sub>**) in  $\text{CD}_2\text{Cl}_2$  at 298 K. Lower, experimental spectrum; upper, simulated with the parameters reported in the Experimental section.

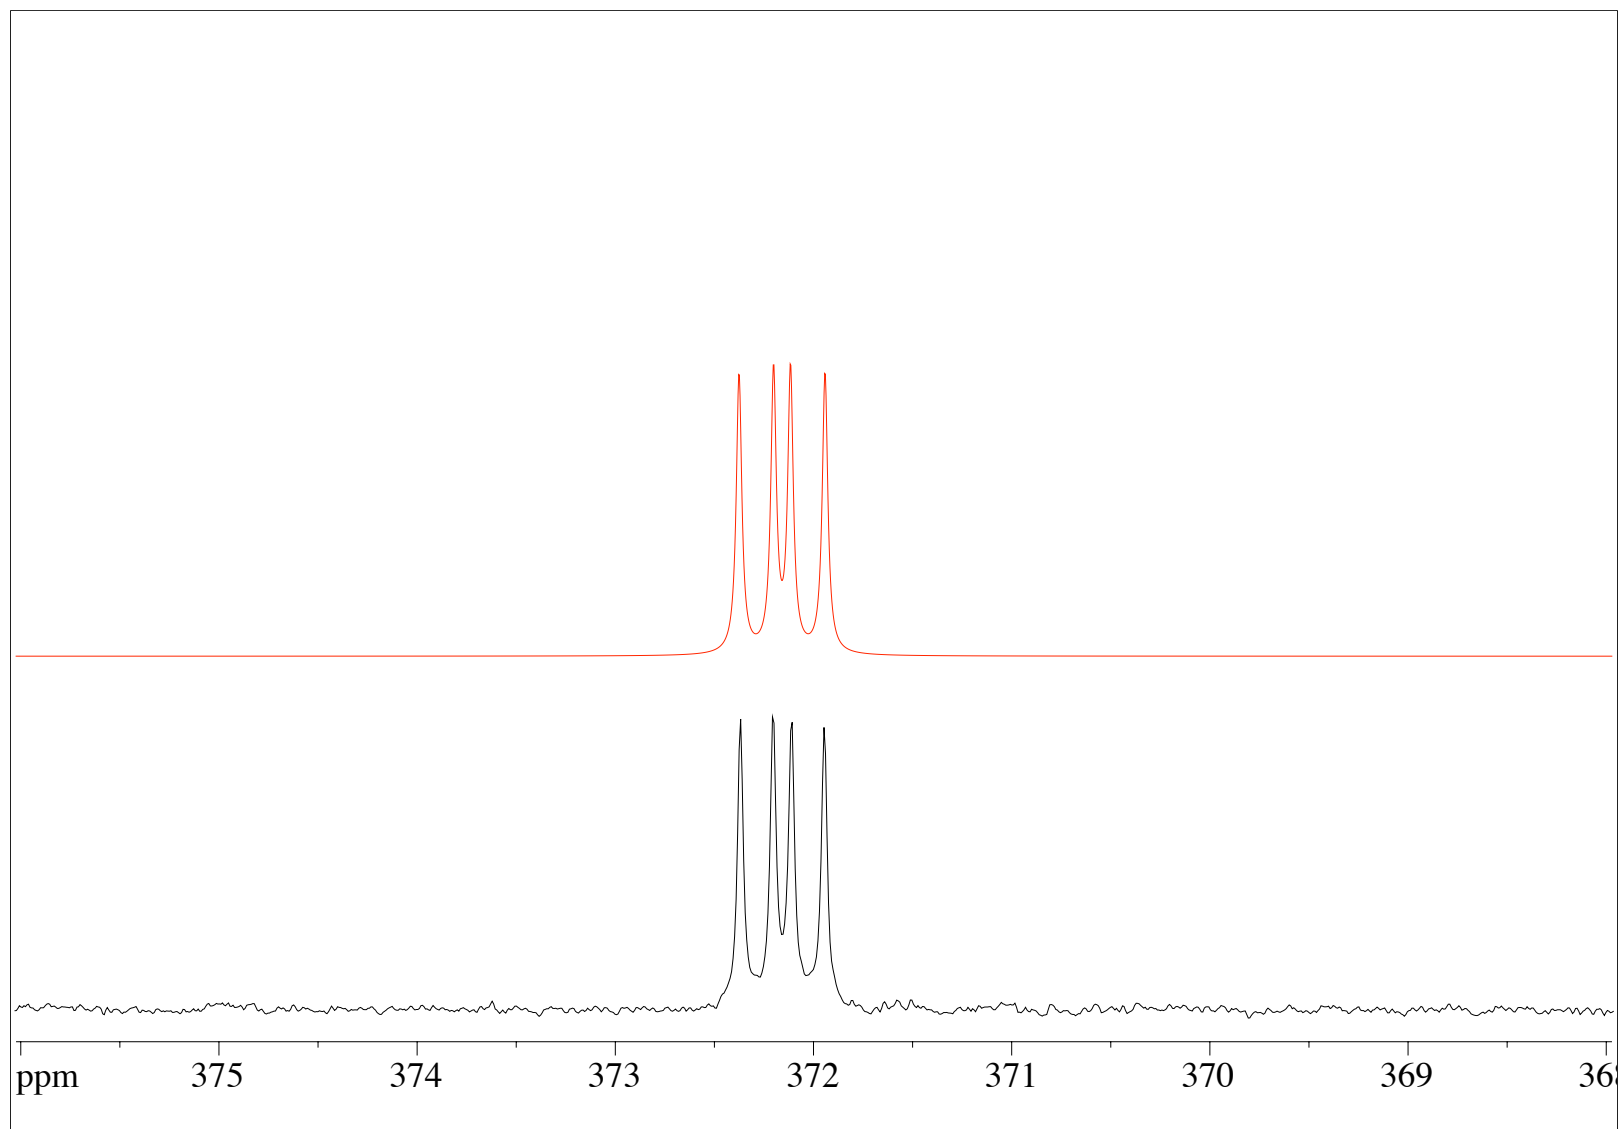

Fig. S5:  $^{15}\text{N}\{^1\text{H}\}$  NMR spectrum of complex  $[\text{Ru}(\eta^5\text{-C}_5\text{Me}_5)(^{15}\text{NH}=\text{NC}_6\text{H}_5)(\text{PPh}_3)\{\text{P}(\text{OEt})_3\}]\text{BPh}_4$  (**9c<sub>1</sub>**) in  $\text{CD}_2\text{Cl}_2$  at 298 K. Lower, experimental spectrum; upper, simulated with the parameters reported in the Experimental section.

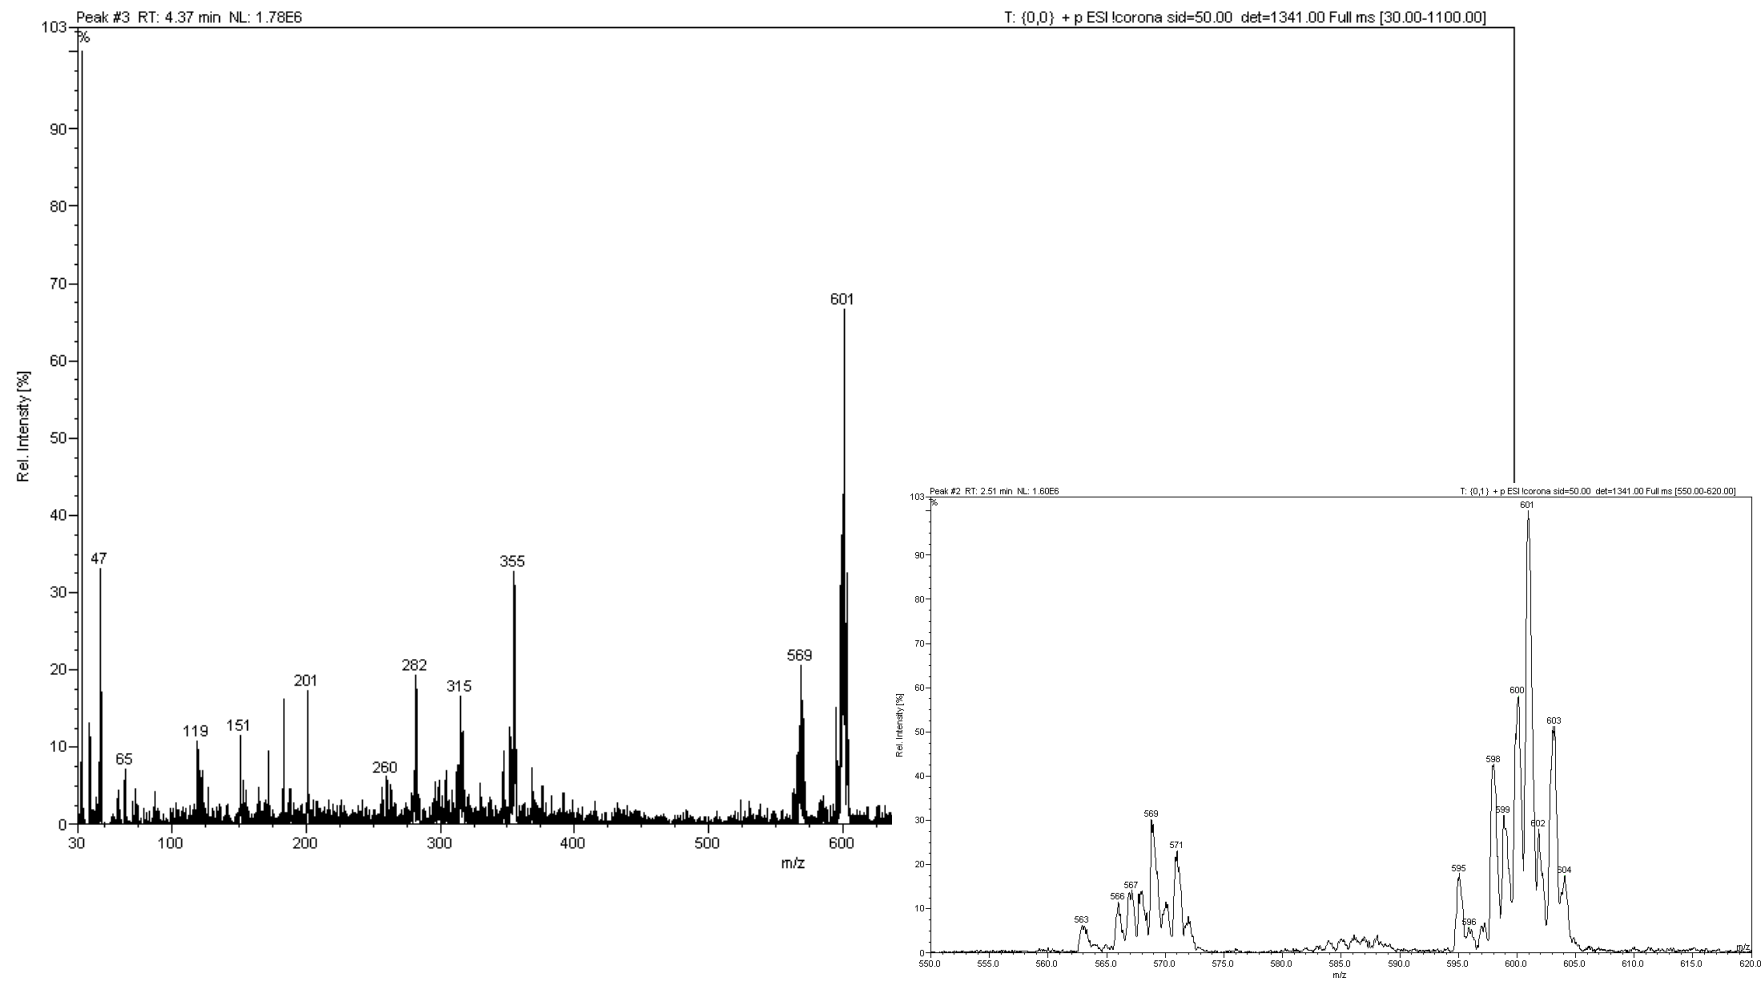

Fig. S6: Full scan ESI(+)-MS spectrum of complex  $[\text{Ru}(\eta^5\text{-C}_5\text{Me}_5)(\text{NH}_2\text{NH}_2)\{\text{P}(\text{OEt})_3\}_2]\text{BPh}_4$  (**2a**).

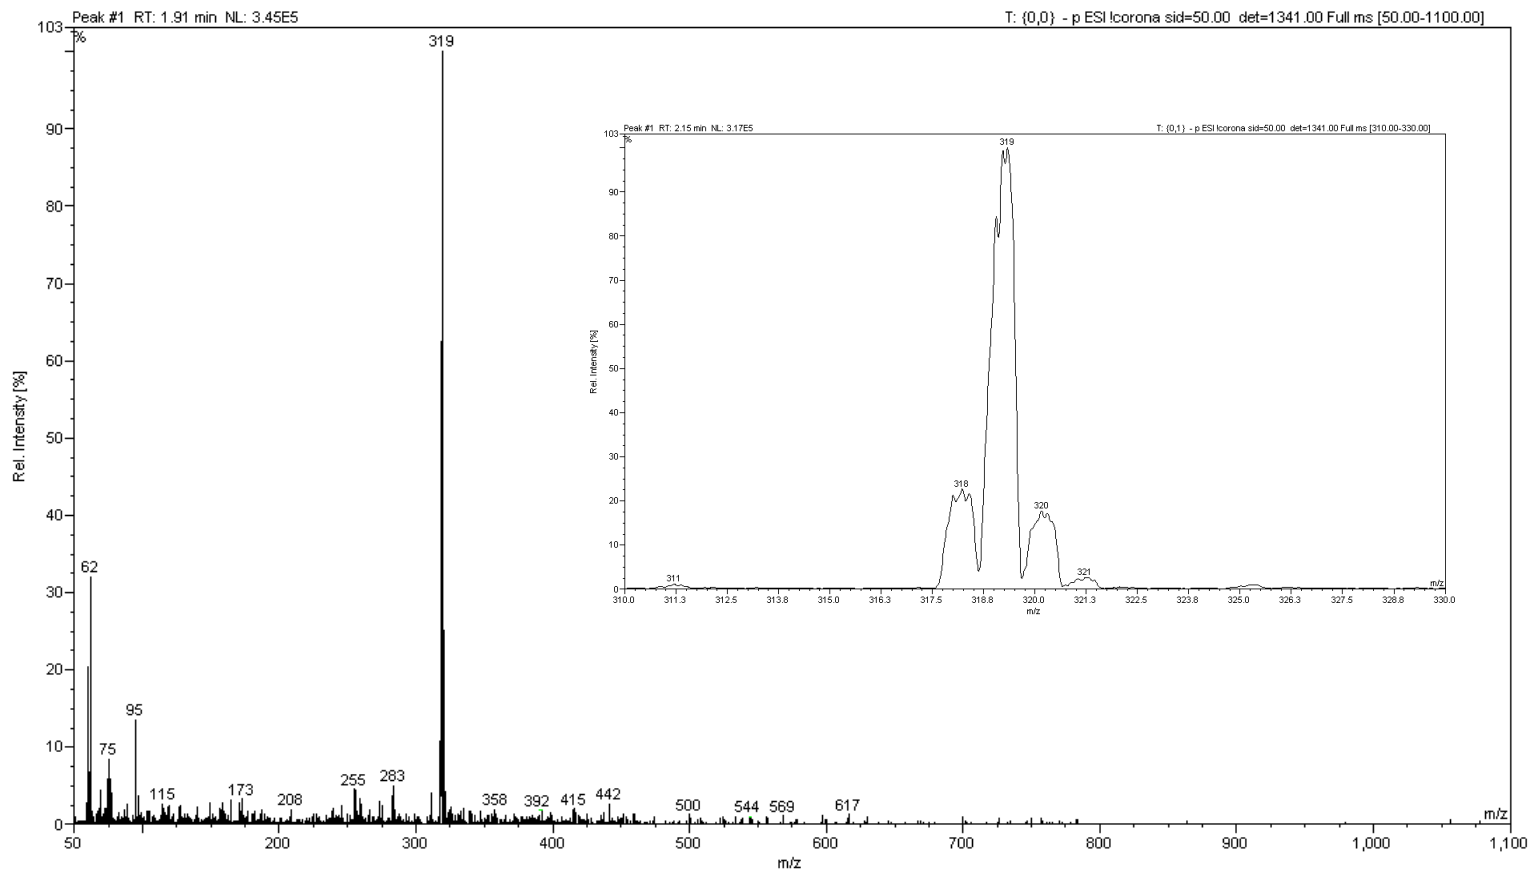

Fig. S8: Full scan ESI(-)-MS spectrum of complex  $[\text{Ru}(\eta^5\text{-C}_5\text{Me}_5)(\text{NH}_2\text{NH}_2)\{\text{P}(\text{OEt})_3\}_2]\text{BPh}_4$  (**2a**).
